# Supplementary material for: Amino acid metabolic signaling influences Aedes aegypti midgut microbiome variability
Source: PubMed Central journal article supplement (PMC5549995; doi:10.1371/journal.pntd.0005677), 2017-07-28

**A**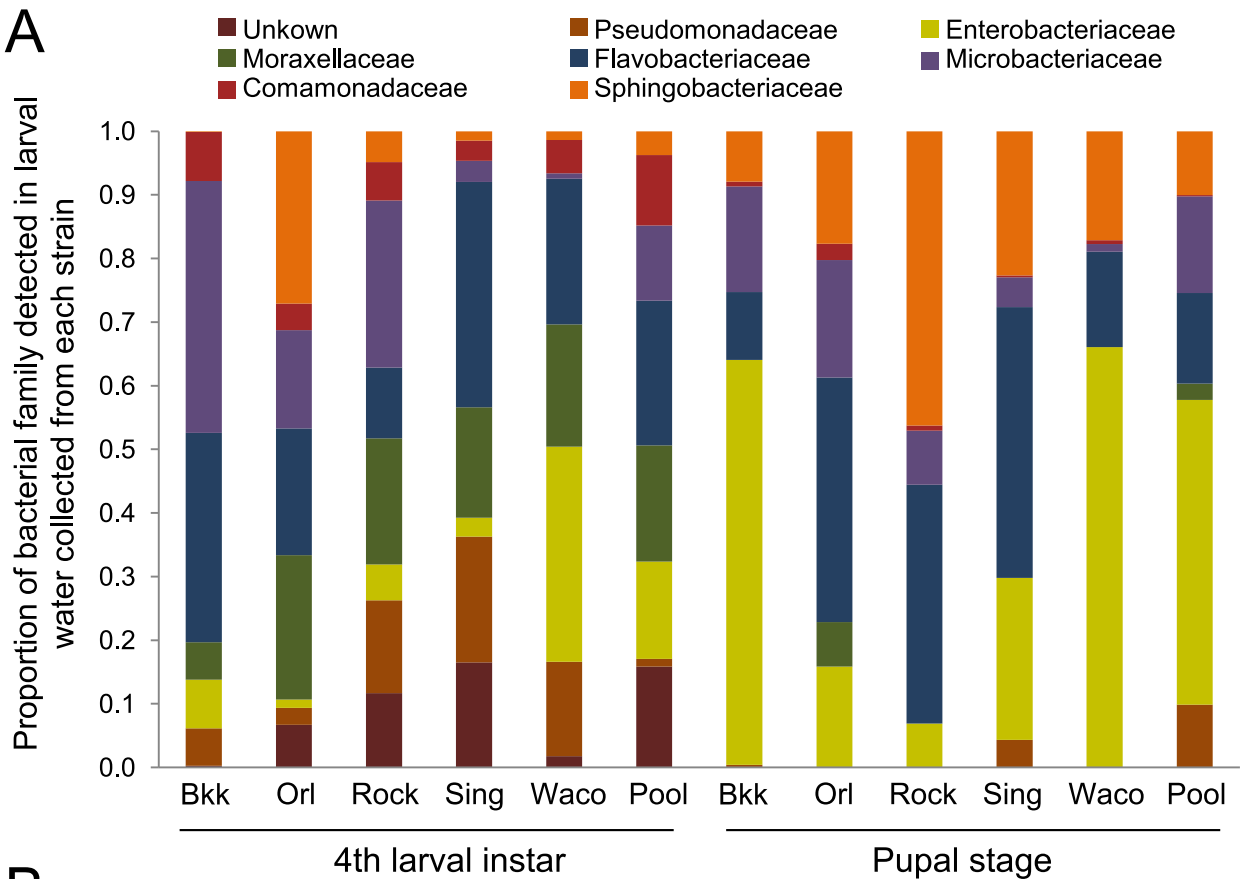**B**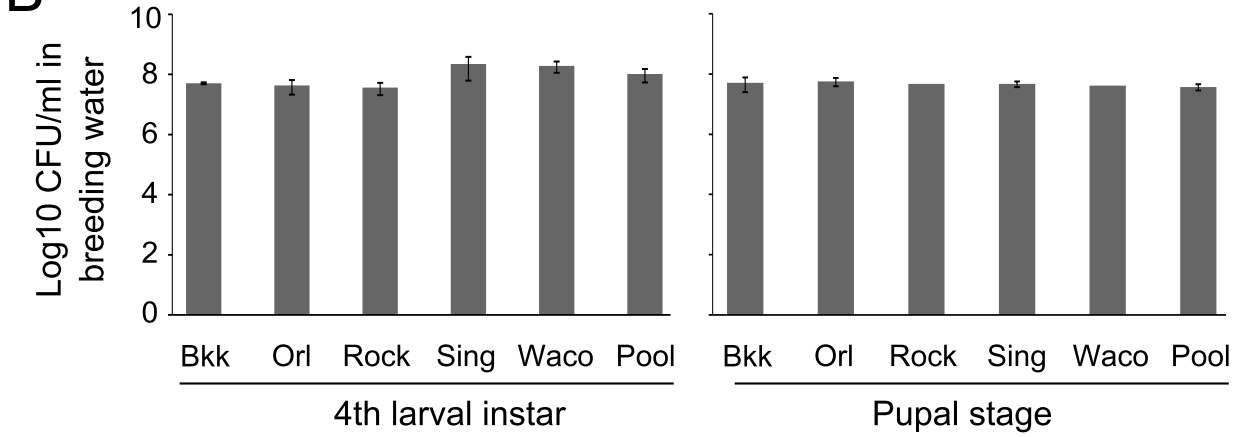

Supplement: pntd.0005677.s001.pdf [file pntd.0005677.s001.pdf]
