# Supplementary material for: Amino acid metabolic signaling influences Aedes aegypti midgut microbiome variability
Source: PubMed Central journal article supplement (PMC5549995; doi:10.1371/journal.pntd.0005677), 2017-07-28

Composition of gut bacteria  
detected by culturing on LB

- Unknown
- Flavobacteriaceae
- Moraxellaceae
- Oxalobacteraceae
- Pseudomonadaceae
- Microbacteriaceae
- Enterobacteriaceae
- Acetobacteraceae

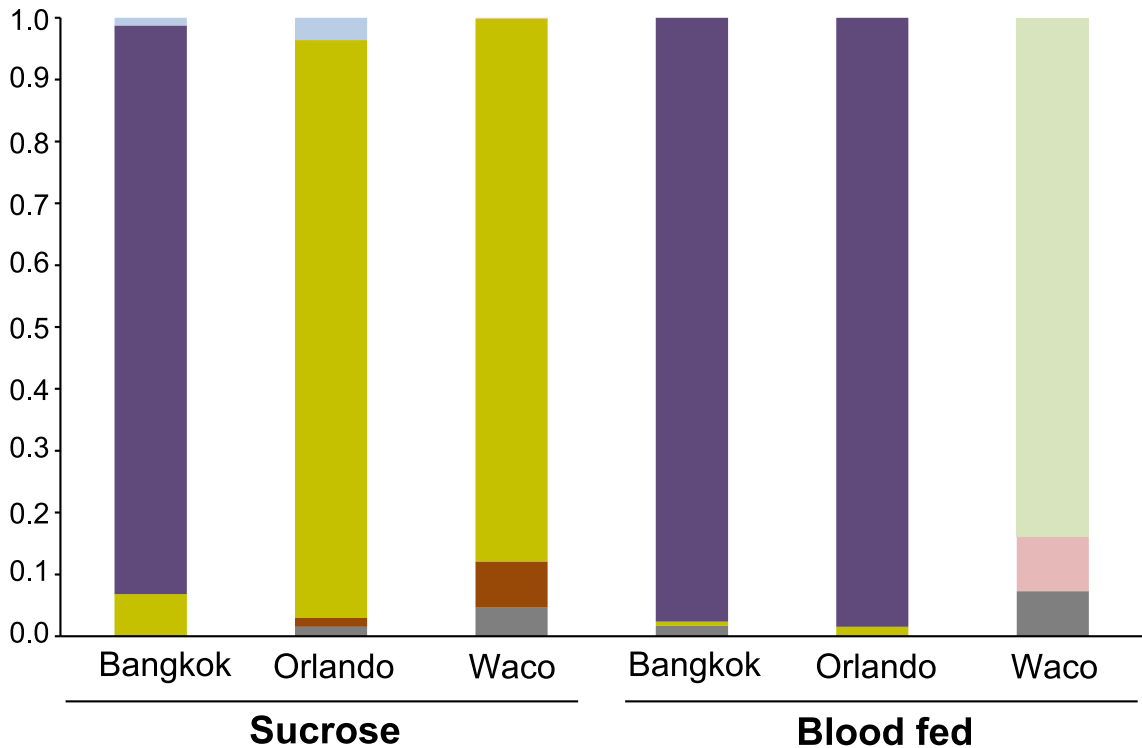

Supplement: pntd.0005677.s002.pdf [file pntd.0005677.s002.pdf]
